# Supplementary material for: Dual RNA-Seq of Mtb-Infected Macrophages In Vivo Reveals Ontologically Distinct Host-Pathogen Interactions
Source: PubMed Central journal article supplement — Cell Rep. Author manuscript; Available in PMC 2020 Feb 20. (PMC7032562; doi:10.1016/j.celrep.2019.12.033), 2020-01-14
Supplement: NIHMS1549887-supplement-1.pdf [file NIHMS1549887-supplement-1.pdf]

**Cell Reports, Volume 30**

**Supplemental Information**

**Dual RNA-Seq of Mtb-Infected Macrophages**

***In Vivo* Reveals Ontologically Distinct**

**Host-Pathogen Interactions**

**Davide Pisu, Lu Huang, Jennifer K. Grenier, and David G. Russell**

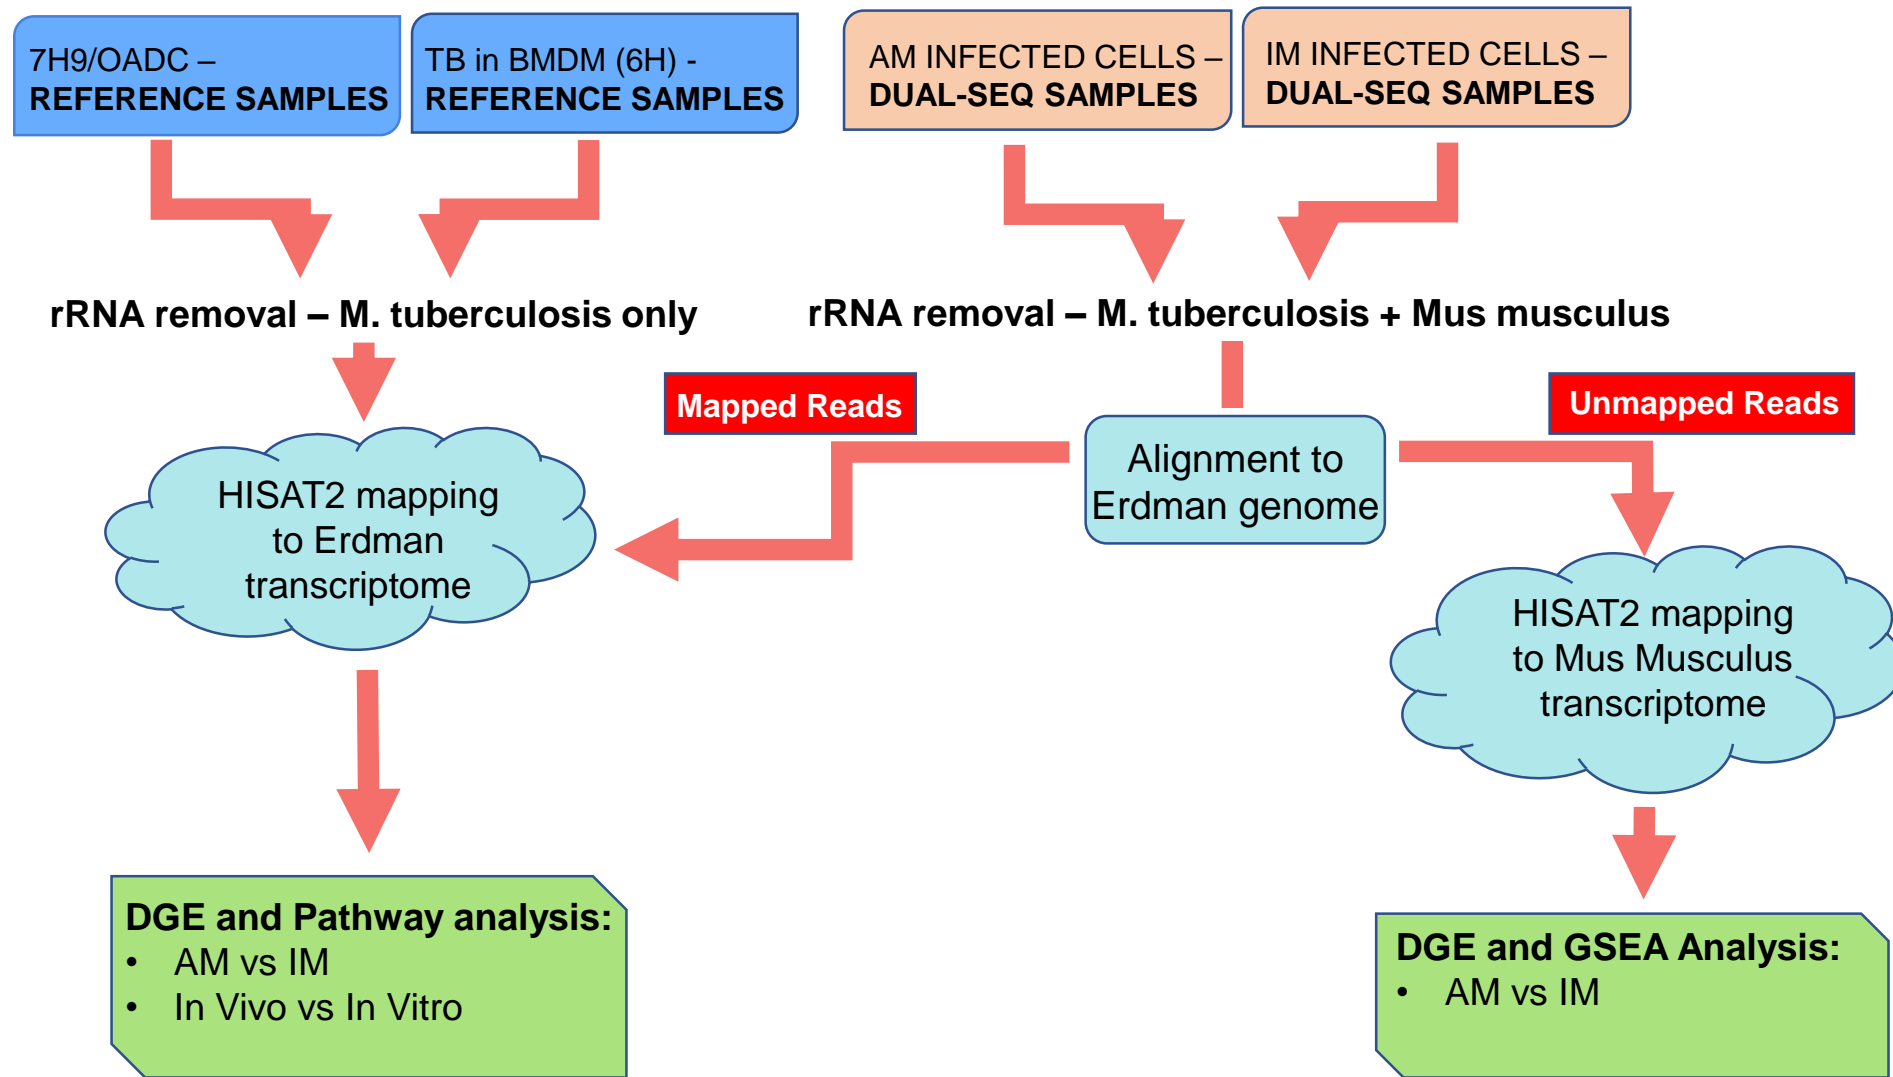

**Figure S1. Diagram of the Data Analysis pipeline. Related to Figure 1 and Table 1.**

(A) Mtb-only samples were aligned against a custom GTF file to remove rRNA reads and then processed with Hisat2 as illustrated in methods. Dual-seq samples were processed for rRNA removal as well and the reads aligned to the Erdman genome. Mapped reads were then aligned to the Mtb transcriptome, while unmapped reads were aligned to the Mus musculus transcriptome. Raw read counts were obtained for both species using the pipeline described in the methods section of the paper.

For *M. tuberculosis* transcriptome analysis the two bacterial datasets from IM- and AM-isolated Mtb were compared against each other as well as against transcriptional profiles generated from cultures of mid-log growing bacteria in 7H9/OADC bacterial medium and early stage (6 hour) infected bone marrow-derived murine (BMDM) macrophages (Reference samples). For *Mus musculus* transcriptome analysis we compared infected and uninfected samples to reveal ontology and infection-specific transcriptional signatures.

**A****1M Reads Subsets vs Full Reference Datasets**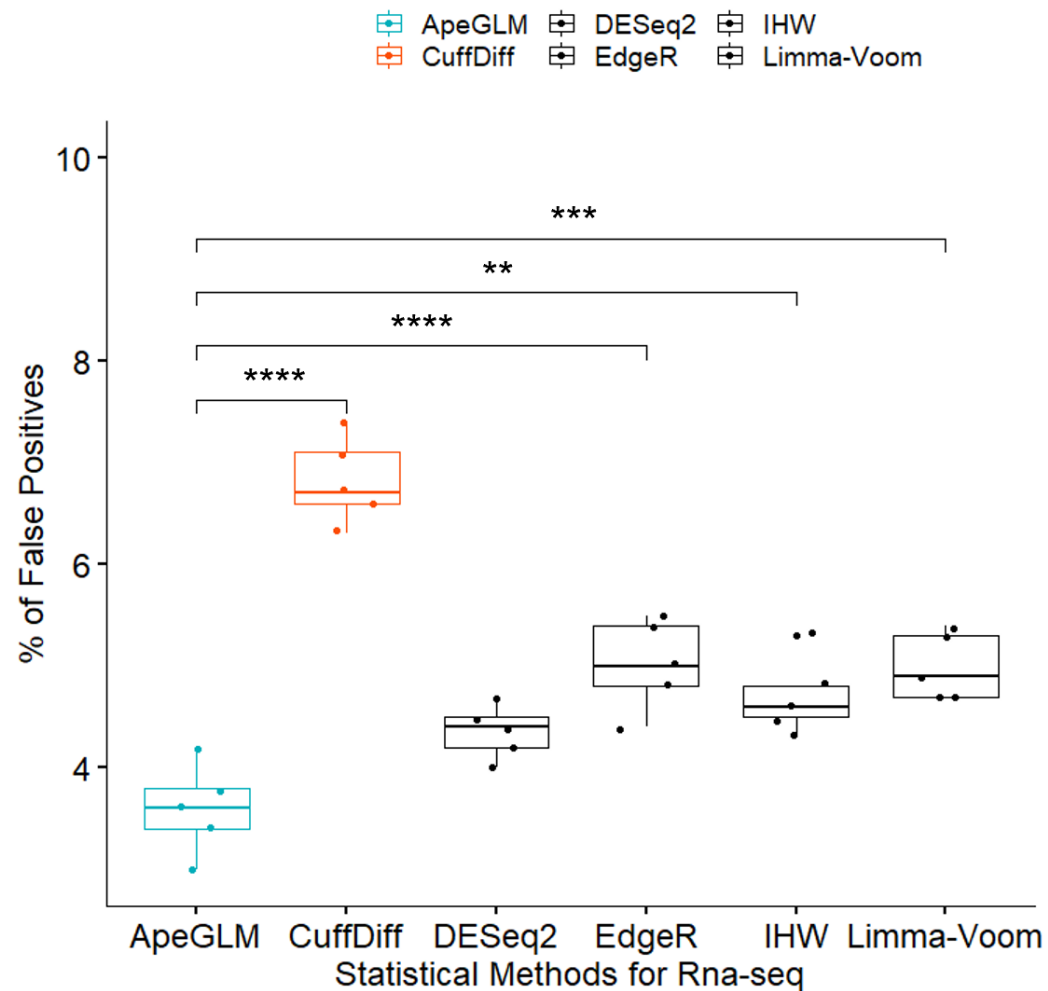**B****1M Reads Subsets vs True DE**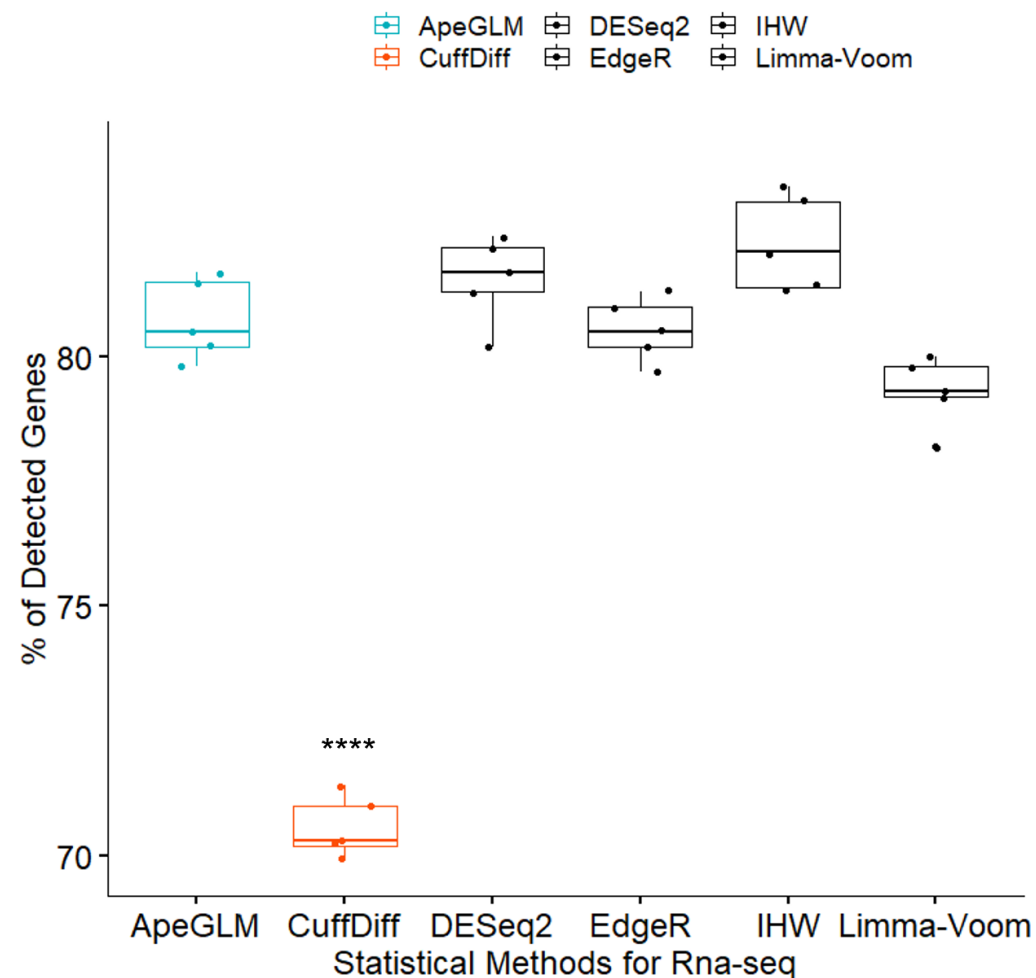

**Figure S2. APEGLM improves the performance of the differential expression analysis for samples with low sequencing depth. Related to Figure 1.**

(A) Percentage of false positives (genes detected as differentially expressed ( $abs(\log_2FC) > 1$ ,  $FDR < 0.05$ ) in the subsets of 1M reads but not called DE in the analysis of the full datasets) for the most common used statistical approaches in Rna-seq analysis. APEGLM outperformed all other methods with a false positive percentage of  $< 4\%$ . Cuffdiff resulted in very unreliable estimates both in terms of false positives and detection power ( $\sim 70\%$  vs an average of  $80\%$ , data not shown). (B) All methods were able to detect more than  $80\%$  of the “TRUE DE” genes in the DGE analysis of the 1M reads subsets, excluding CuffDiff for which the detection power was  $\sim 70\%$ . P-values were calculated using one-way ANOVA followed by Tukey’s post hoc test.

## A PDIM Synthesis and Transport

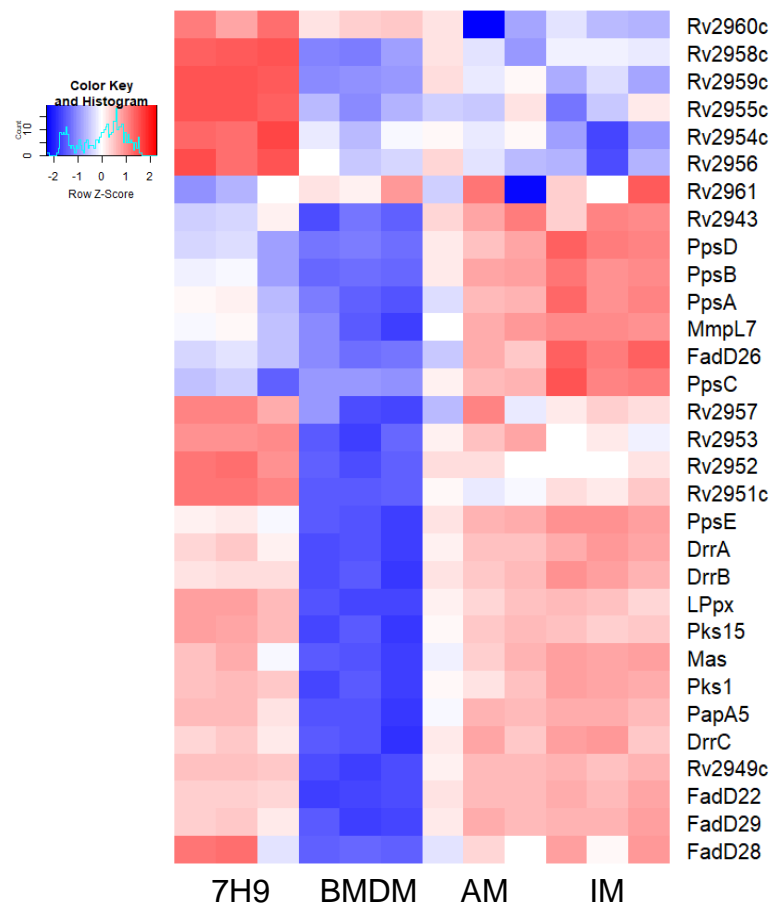

## B Organic Nitrogen

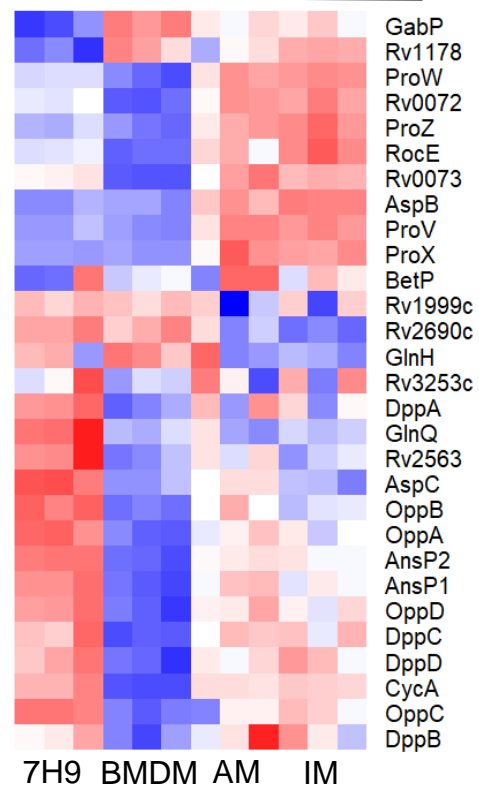

## C

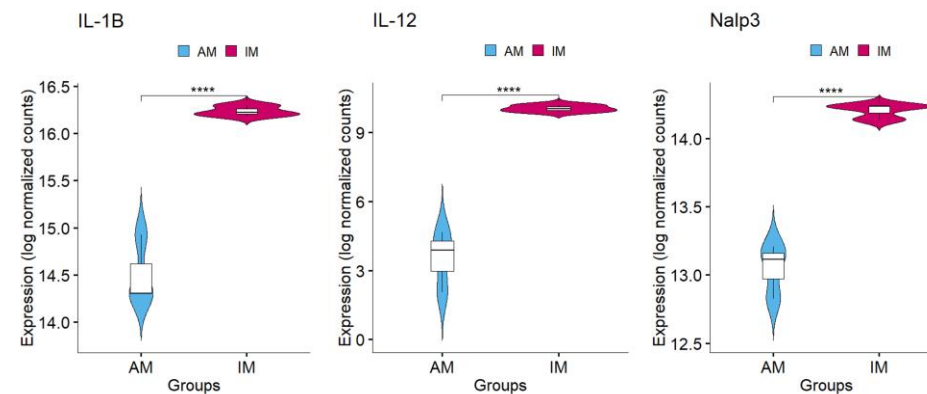

**Figure S3. Relative expression levels for Mtb gene-sets specifically upregulated *in vivo*. Related to Figure 2.**

(A-B) Heatmaps showing relative expression levels for genes in the PDIM and organic nitrogen pathways in Mtb. (C) Violin plots showing expression levels for the *Il-1B*, *Il-12*, *Nalp3* host genes in the AM- and IM-infected macrophages. Statistical significance is shown on the picture. (\* p-adj. <0.05, \*\* p-adj. <0.01, \*\*\* p-adj. <0.001, \*\*\*\*p-adj. <0.0001). Q-values for comparisons among the groups were calculated using the Wald test as implemented in the DESeq2 pipeline.

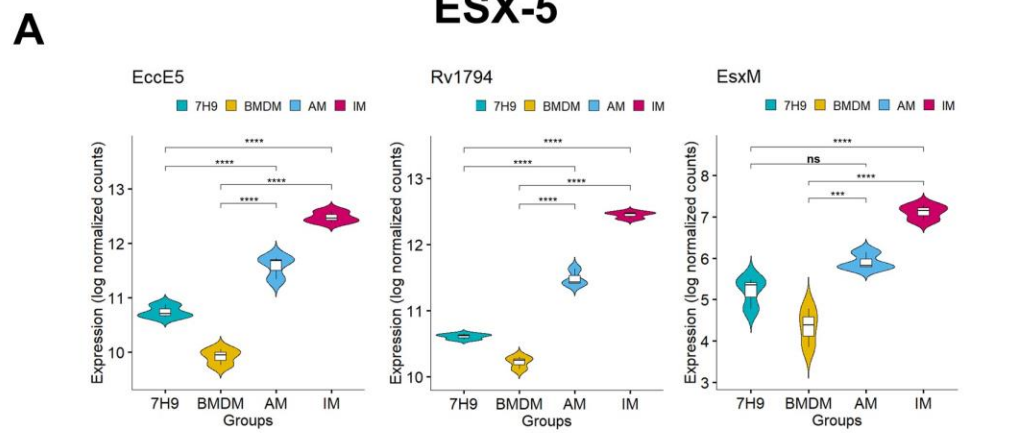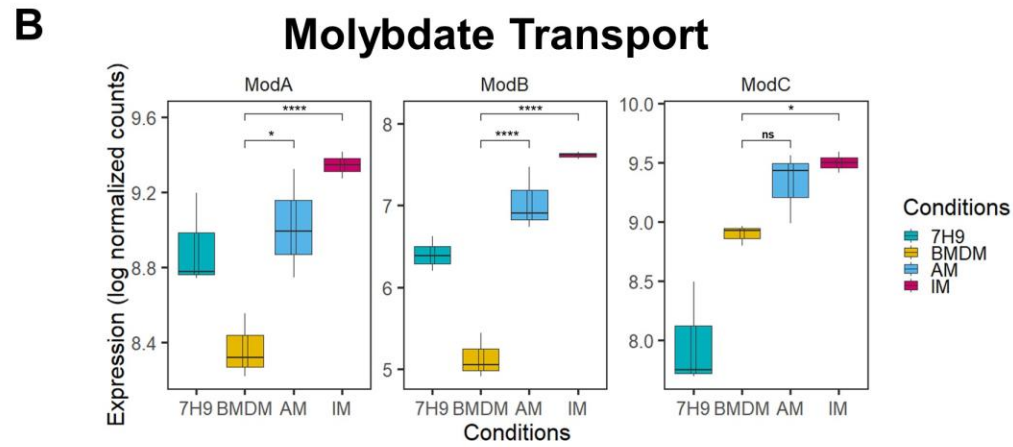

### MTB

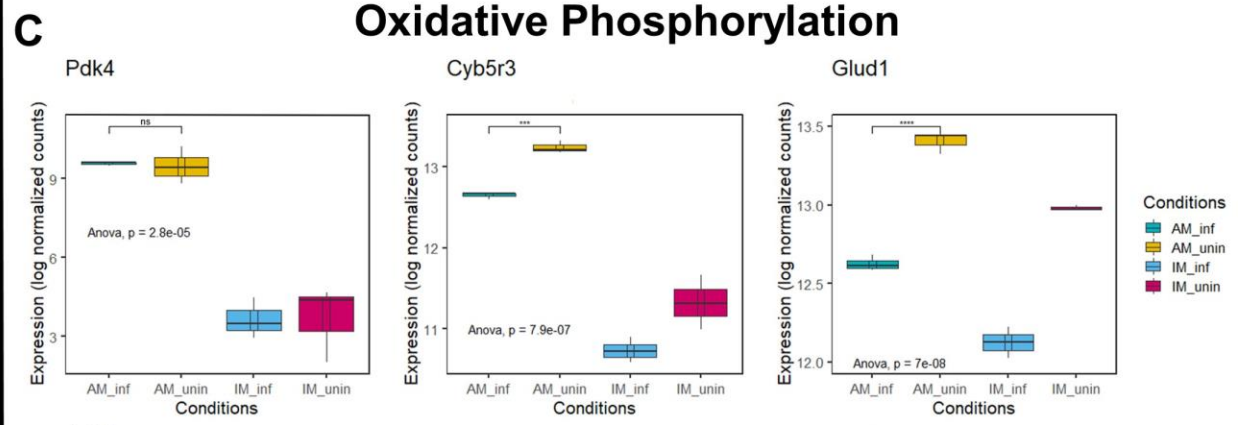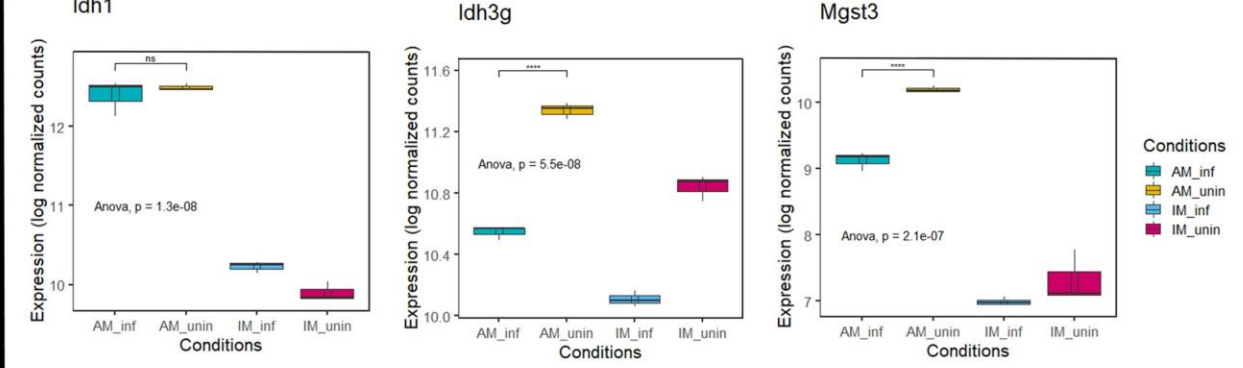

### Lipid Metabolism

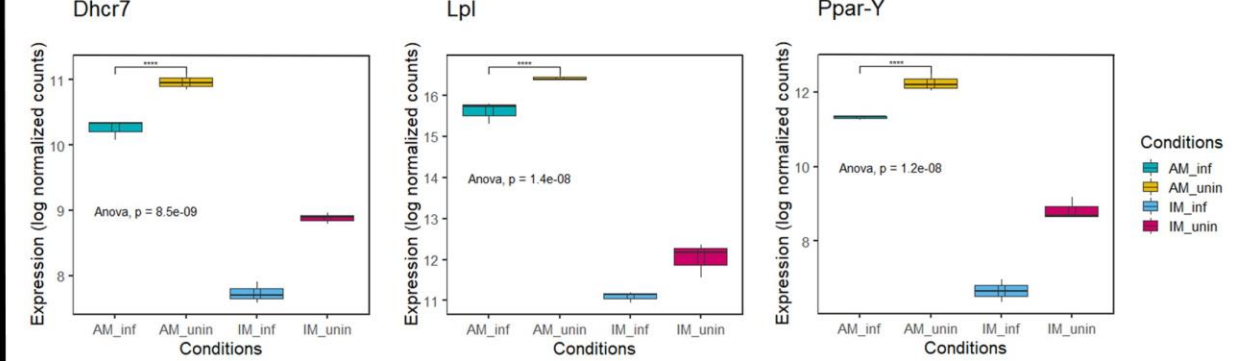

### MACROPHAGES

**Figure S4. Relative expression levels for cluster of genes in both Mtb and the host cells. Related to Figure 2 and 4.**  
 (A) Violin-plots showing expression levels (in log-normalized counts) of genes involved in the ESX-5 pathway. (B) Boxplots showing expression levels (in log-normalized counts) of genes involved in Molybdate transport in Mtb. (C) Boxplots showing expression levels (in log-normalized counts) for genes involved in oxidative phosphorylation and lipid metabolism in different host cell conditions. Statistical significance is shown on the picture. (\* p-adj. <0.05, \*\* p-adj. <0.01, \*\*\* p-adj. <0.001, \*\*\*\*p-adj. <0.0001). Q-values for comparisons among the groups were calculated using the Wald test as implemented in the DESeq2 pipeline.

BYSTANDER – UNINFECTED HOST CELLS

AM

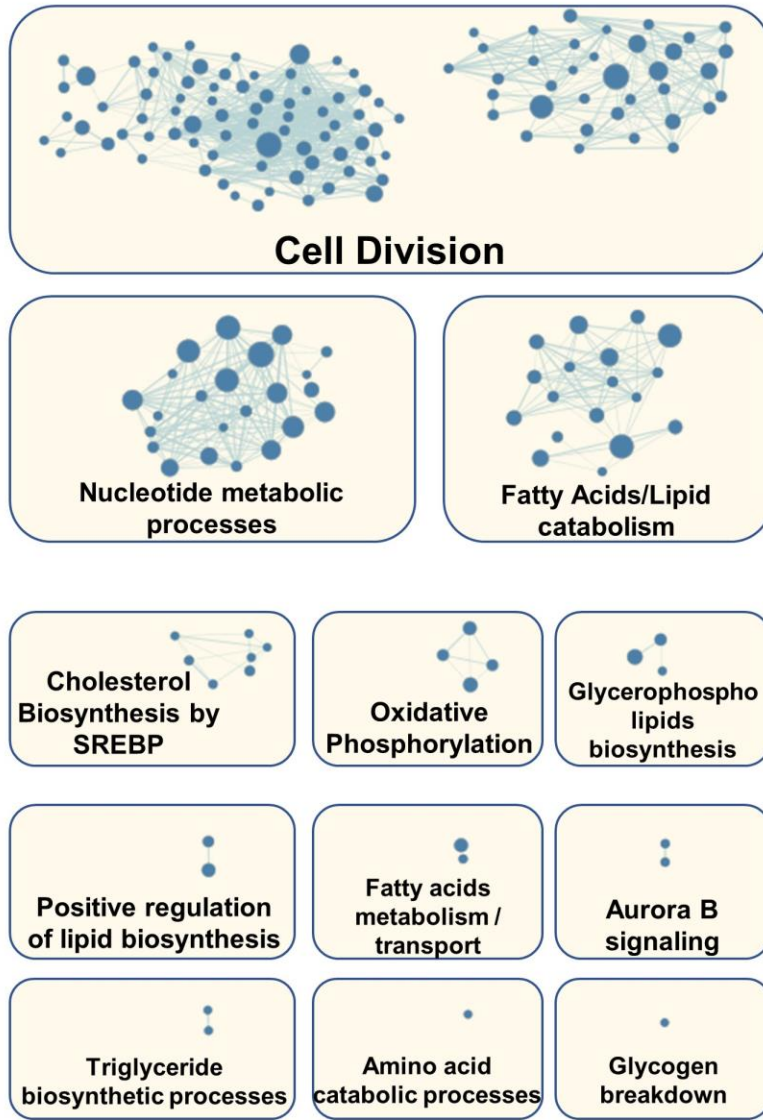

IM

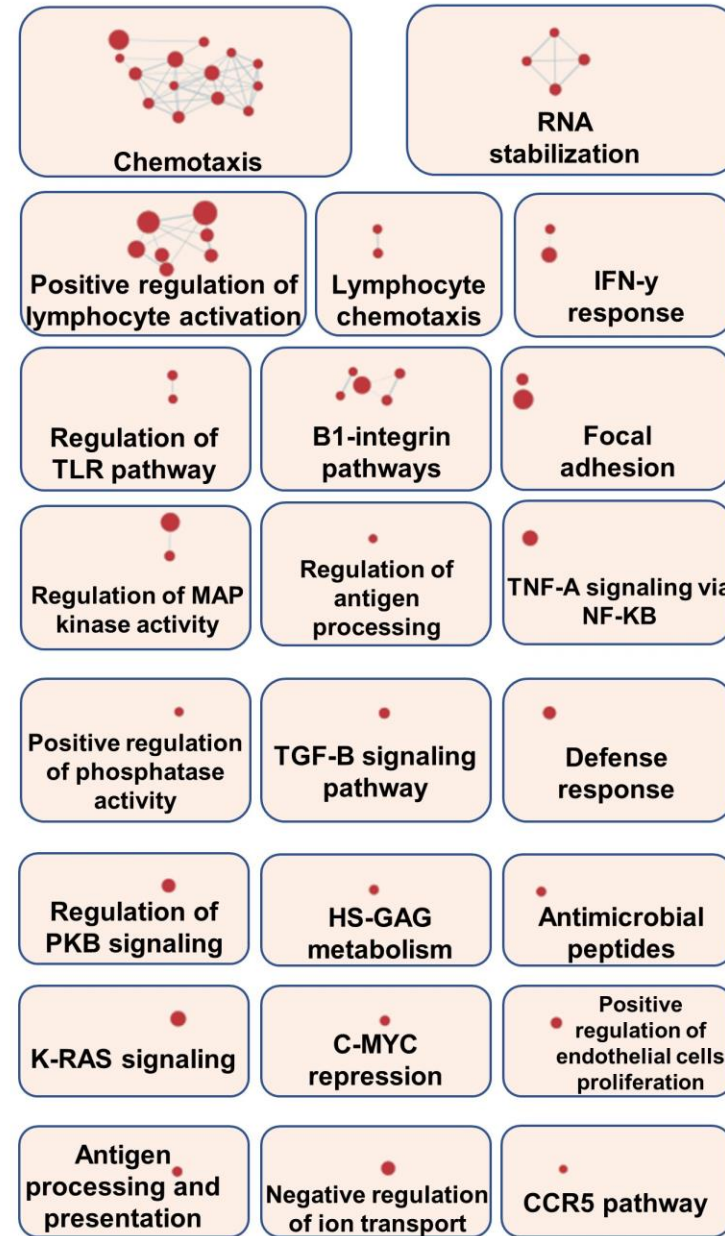

GSEA – Top gene-sets enriched at p-value < 0.01

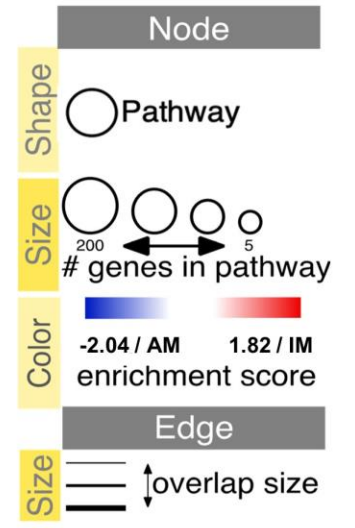

Figure S5. Enrichment map comparing pathways upregulated in uninfected-AM vs uninfected-IM. Related to Figure 3.

## Pro-inflammatory Cytokines

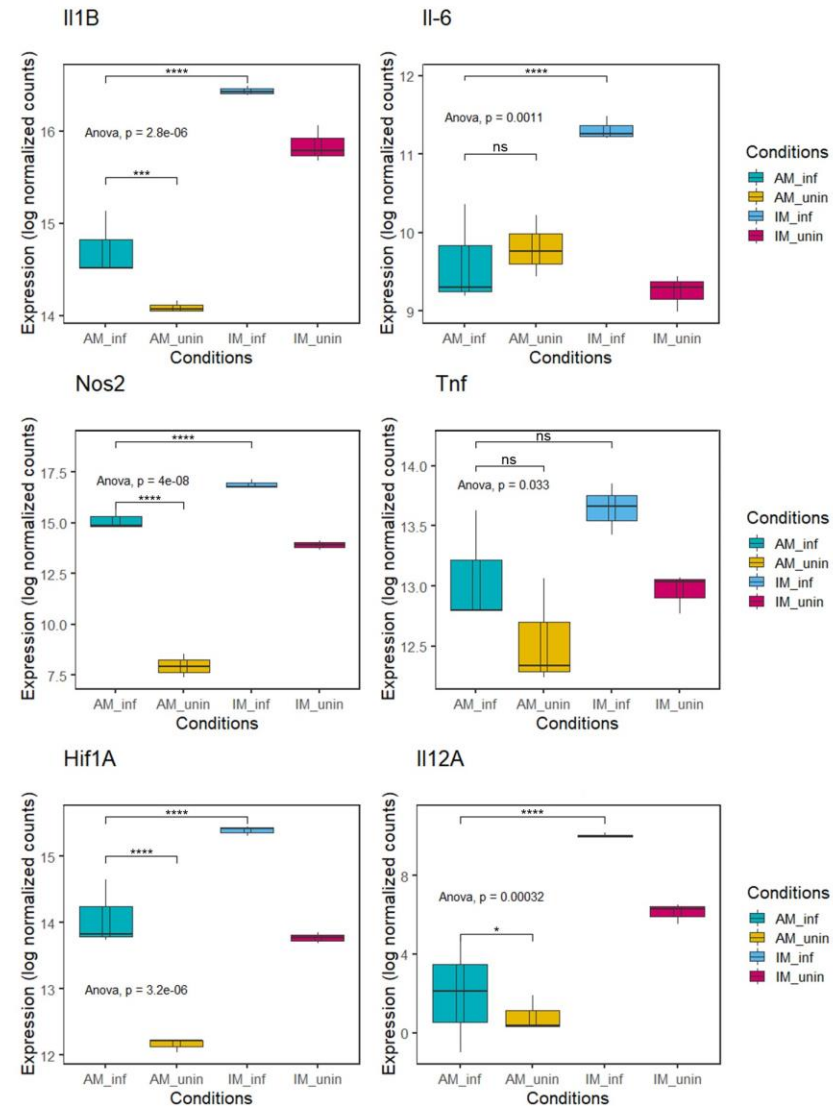

**Figure S6. Relative expression levels of pro-inflammatory cytokines in different populations of host macrophages. Related to Figure 4.**

(A) Boxplots showing relative expression levels (in log-normalized counts) for pro-inflammatory cytokines in different host cell conditions. Statistical significance is shown on the picture. ( \* p-adj. <0.05, \*\* p-adj. <0.01, \*\*\* p-adj. <0.001, \*\*\*\*p-adj. <0.0001). Q-values for comparisons among the groups were calculated using the Wald test as implemented in the DESeq2 pipeline.

| Sample                                     | Raw Reads | Mouse  |                |              |       | <i>M.tuberculosis</i> |                |            |                |
|--------------------------------------------|-----------|--------|----------------|--------------|-------|-----------------------|----------------|------------|----------------|
|                                            |           | rRNA   | % of Raw Reads | Mouse Mapped | %     | rRNA                  | % of Raw Reads | Mtb Mapped | % of Raw Reads |
| No Enrichment 1                            | 27.7 M    | 4.6 M  | 16.8%          | 9.4 M        | 41%   | 0.09 M                | 0.3%           | 0.03M      | 0.14%          |
| No Enrichment 2                            | 20.8 M    | 3.5 M  | 16.9%          | 6.2 M        | 37%   | 0.03 M                | 0.2%           | 0.04 M     | 0.2%           |
| BMDM – 50% host RNA removal                | 54.2 M    | 14.1 M | 26%            | 21.9 M       | 40%   | 0.3 M                 | 0.55%          | 4.9 M      | 9 %            |
| BMDM – 30% host RNA removal                | 55.6 M    | 4.7 M  | 8%             | 35.1 M       | 63.1% | 0.15M                 | 0.27%          | 2.9 M      | 5.2%           |
| Control – TB only RNA extraction from BMDM | 29.1 M    | 1.9 M  | 6.5%           | 0.01 M       | 0%    | 2.1 M                 | 7.2%           | 18.6 M     | 64 %           |

**Table S1. Number of reads for each of the test samples matching to either *M.tuberculosis* or *Mus Musculus* genomes. Related to Figure 1.**



| Comparison       | Number of DGE genes, p.adj < 0.05 | Breakdown                              |
|------------------|-----------------------------------|----------------------------------------|
| 7H9-OADC vs IM   | 2486 LFC > 0                      | 1207 up in 7H9-OADC<br>1279 up in IM   |
| 7H9-OADC vs AM   | 2019 LFC > 0                      | 942 up in 7H9-OADC<br>1077 up in AM    |
| 7H9-OADC vs BMDM | 2934 LFC > 0                      | 1474 up in 7H9-OADC<br>1460 up in BMDM |
| BMDM vs IM       | 2610 LFC > 0                      | 1346 up in BMDM<br>1264 up in IM       |
| BMDM vs AM       | 2657 LFC > 0                      | 1306 up in BMDM<br>1351 up in AM       |
| AM vs IM         | 319 LFC > 0                       | 96 up in AM<br>223 up in IM            |

**Table S2. Number of genes differentially expressed by *M.tuberculosis* in each of the different combinations of environmental conditions analyzed in this study. Related to Figure 3.**
